# Supplementary material
Source: MDPI journal article supplement (https://www.mdpi.com/2073-4433/13/6/995)
Supplement: s1 [file s1]

# Impacts of Different Land Use Scenarios on Future Global and Regional Climate Extremes

Tao Hong <sup>1</sup>, Junjie Wu <sup>1,2,\*</sup>, Xianbiao Kang <sup>1</sup>, Min Yuan <sup>1</sup> and Lian Duan <sup>1</sup>

**Table S1.** Definition and description of extreme temperature and extreme precipitation indices.

| Index   | Description                                                                                  |
|---------|----------------------------------------------------------------------------------------------|
| TXx     | Annual maximum value of daily maximum temperature (°C)                                       |
| TXn     | Annual minimum value of daily maximum temperature (°C)                                       |
| TNx     | Annual maximum value of daily minimum temperature (°C)                                       |
| TNn     | Annual minimum value of daily minimum temperature (°C)                                       |
| TX10p   | Percentage of days when daily maximum temperature <10th percentile (%)                       |
| TX90p   | Percentage of days when daily maximum temperature >90th percentile (%)                       |
| TN10p   | Percentage of days when daily minimum temperature <10th percentile (%)                       |
| TN90p   | Percentage of days when daily minimum temperature >90th percentile (%)                       |
| WSDI    | Annual count of days with at least 6 consecutive days when TX > 90th percentile (days)       |
| CSDI    | Annual count of days with at least 6 consecutive days when TN < 10th percentile (days)       |
| Rx1day  | Annual maximum 1-day precipitation (mm)                                                      |
| Rx5day  | Annual maximum consecutive 5-day precipitation (mm)                                          |
| RR1     | Annual count of days when precipitation ≥ 1 mm (days)                                        |
| R10mm   | Annual count of days when precipitation ≥ 10 mm (days)                                       |
| R20mm   | Annual count of days when precipitation ≥ 20 mm (days)                                       |
| CDD     | maximum number of consecutive days with precipitation < 1mm (days)                           |
| CWD     | maximum number of consecutive days with precipitation ≥ 1mm (days)                           |
| PRCPTOT | Annual total precipitation on wet (precipitation ≥1mm) days (mm)                             |
| R95pTOT | Contribution to total precipitation from very wet (precipitation > 95th percentile) days (%) |
| R99pTOT | Contribution to total precipitation from very wet (precipitation > 99th percentile) days (%) |

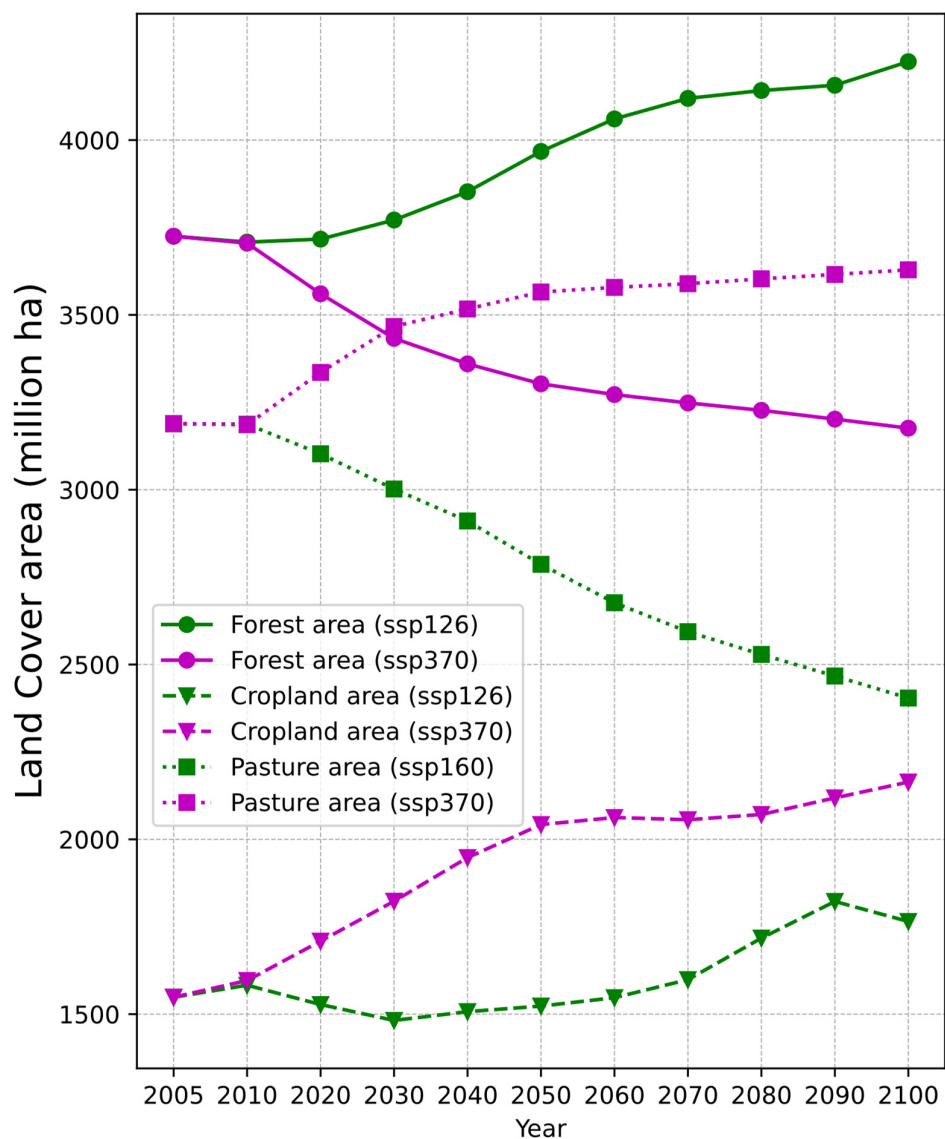

**Figure S1.** Time series of projected global average forest cover, cropland and pasture area under SSP1-2.6 and SSP3-7.0 land use scenarios (2015-2100), data are from the SSP Database (<https://tntcat.iiasa.ac.at/SspDb>, last access: 23 May 2022) performed by IAMs (Integrated Assessment Models).

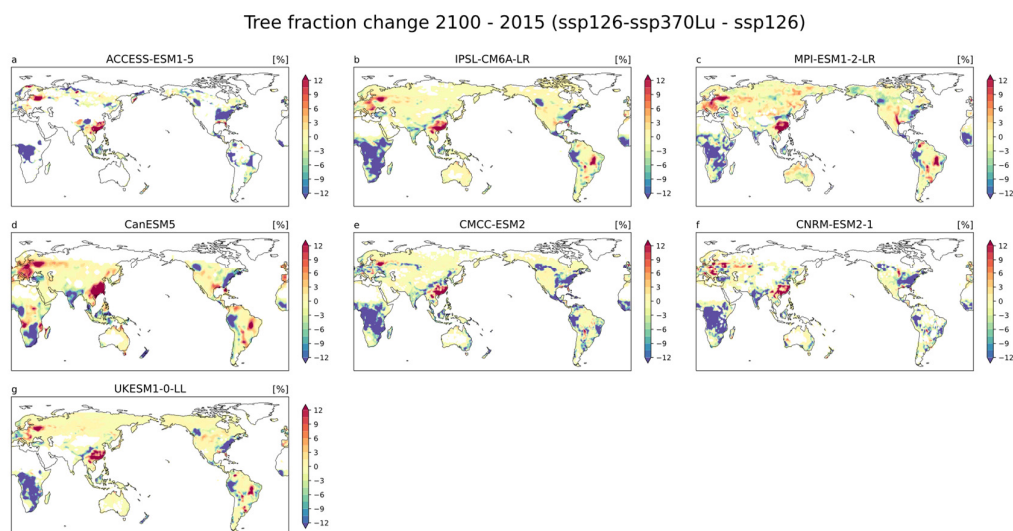

**Figure S2.** The differences of tree fraction cover changes (2100 - 2015) between ssp126-ssp370Lu and ssp126 simulation, performed by each CMIP6 model. (a) ACCESS-ESM1-5, (b) IPSL-CM6A-LR, (c) MPI-ESM1-2-LR, (d) CanESM5, (e) CMCC-ESM2, (f) CNRM-ESM2-1, (g) UKESM1-0-LL.

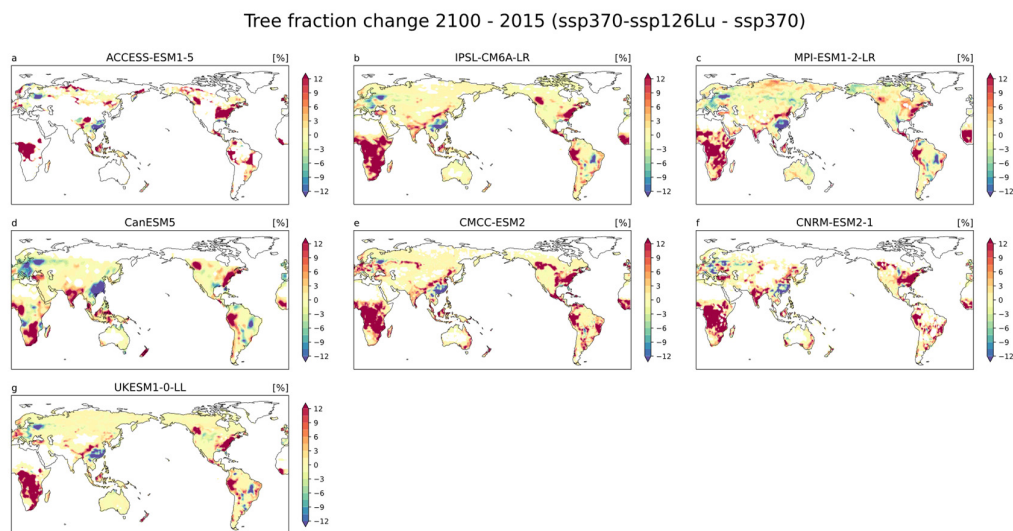

**Figure S3.** Similar to Supplementary Figure S2 but for differences between ssp370-ssp126Lu and ssp370 simulation. (a) ACCESS-ESM1-5, (b) IPSL-CM6A-LR, (c) MPI-ESM1-2-LR, (d) CanESM5, (e) CMCC-ESM2, (f) CNRM-ESM2-1, (g) UKESM1-0-LL.

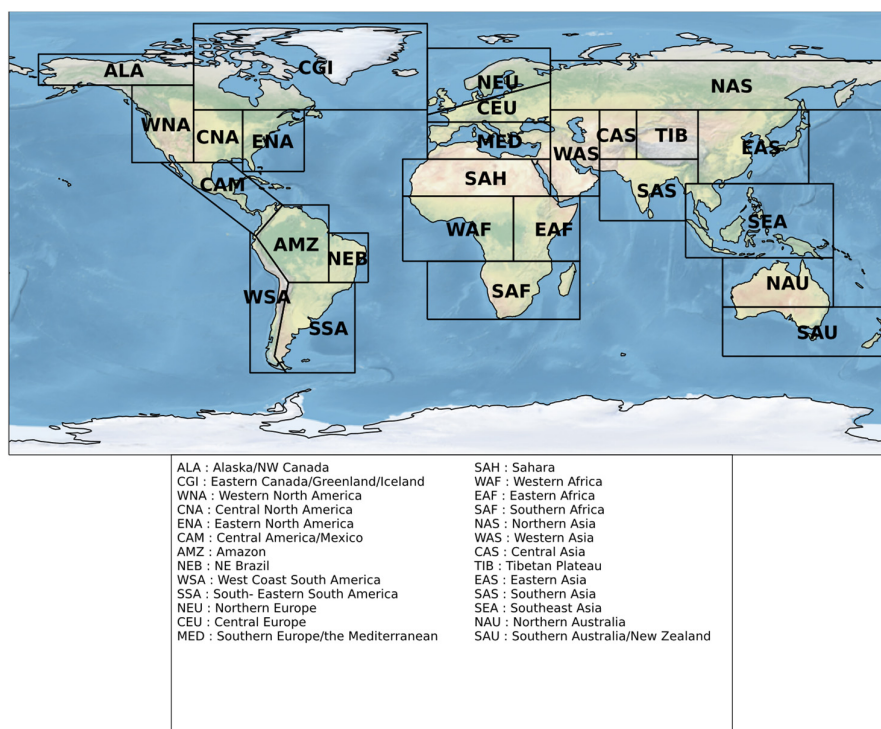

**Figure S4.** Spatial boundaries of the geographical regions defined in the IPCC 5th Assessment Report.

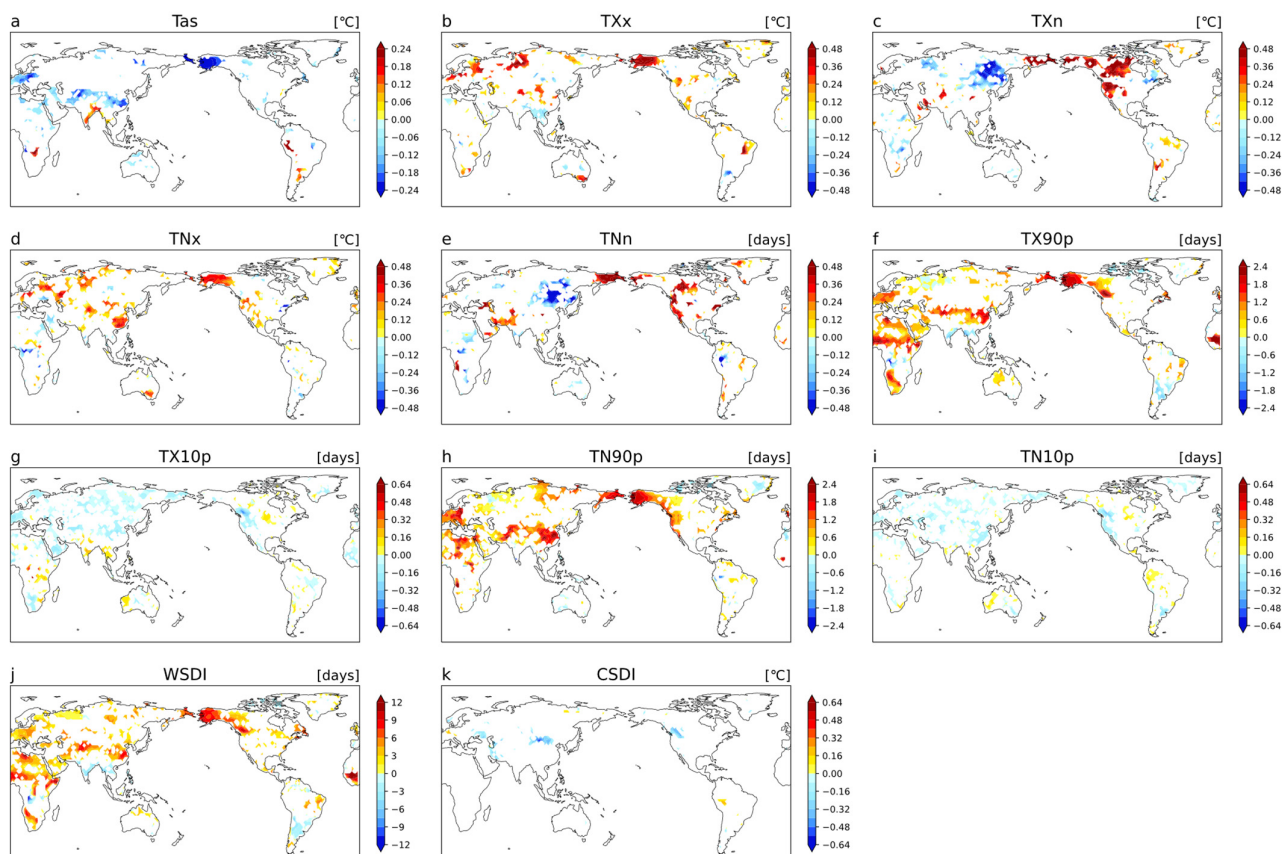

**Figure S5.** Similar to Figure 1 but for impact of land use change under SSP3-7.0 scenario (i.e. ssp370-ssp126lu – ssp370). (a) mean temperature, (b) TXx, (c) TXn, (d) TNx, (e) TNn, (f) TX90p, (g) TX10p, (h) TN90p, (i) TN10p, (j) WSDI, (k) CSDI.

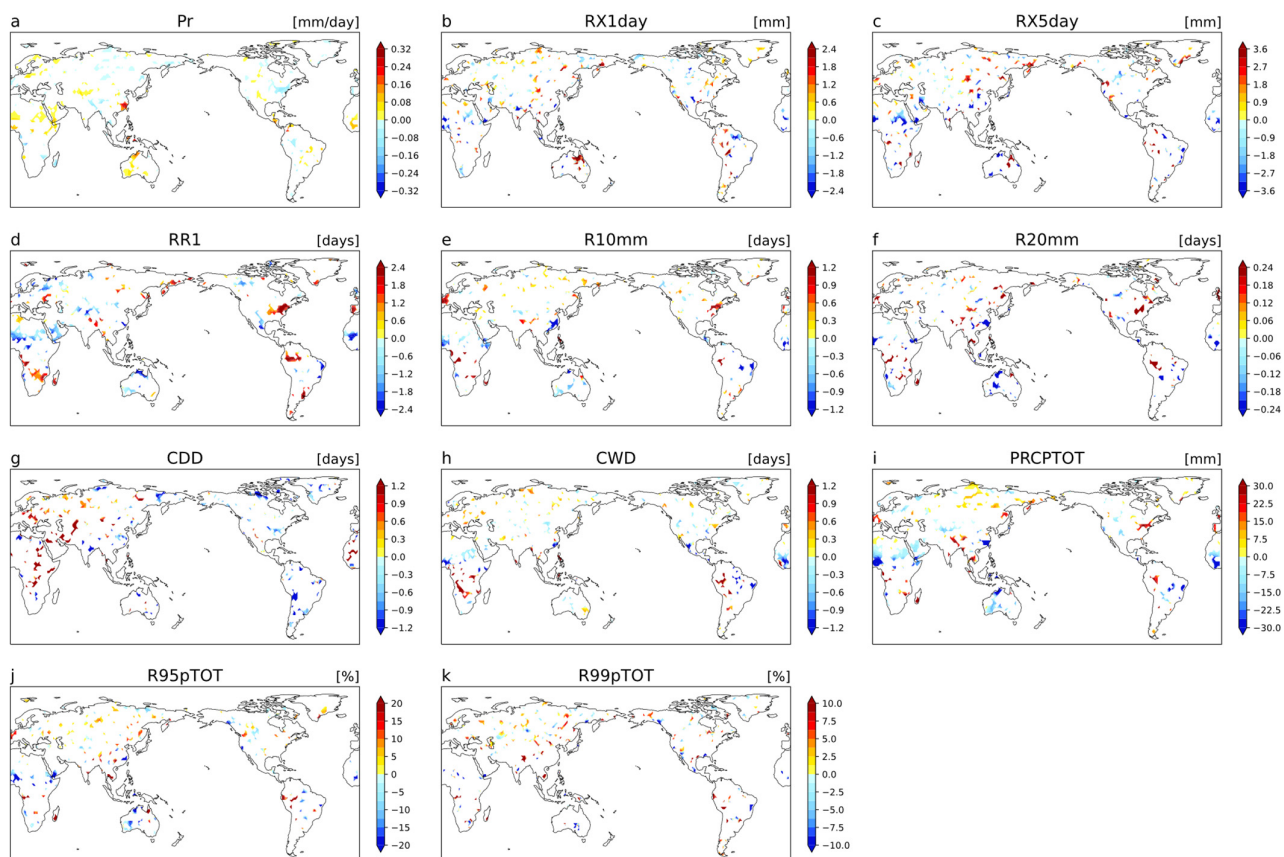

**Figure S6.** Similar to Figure 2 but for impact of land use change under SSP3-7.0 scenario (i.e. ssp370-ssp126lu – ssp370). (a) mean precipitation, (b) RX1day, (c) RX5day, (d) RR1, (e) R10mm, (f) R20mm, (g) CDD, (h) CWD, (i) PRCPTOT, (j) R95pTOT, (k) R99pTOT.



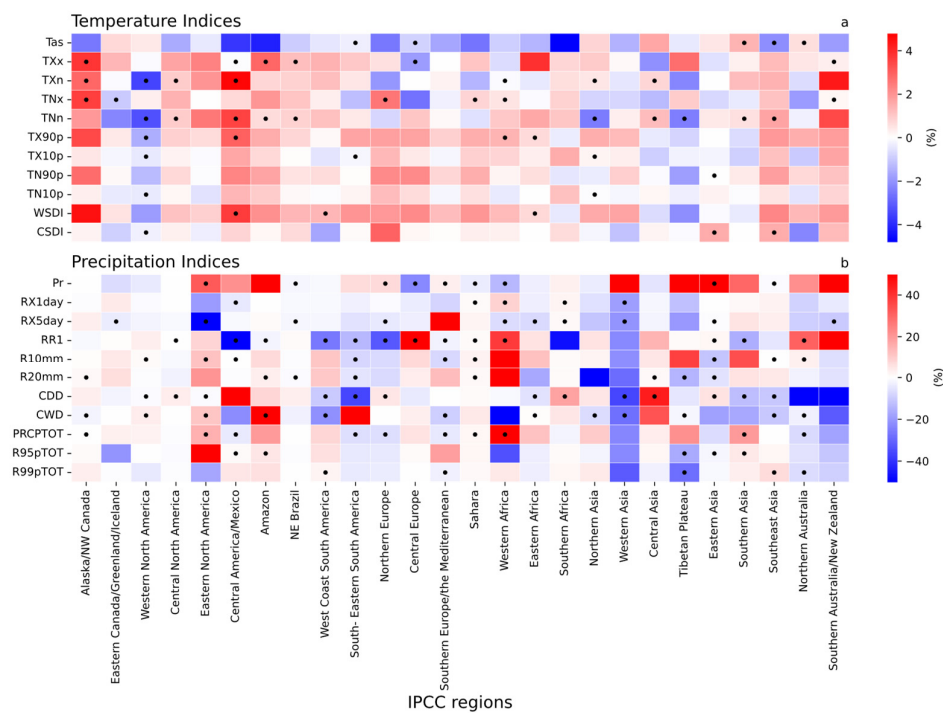

**Figure S7.** Similar to Figure 3 but for regional relative contribution of land use change (i.e. ssp370-ssp126lu – ssp370) under SSP3-7.0 scenario.

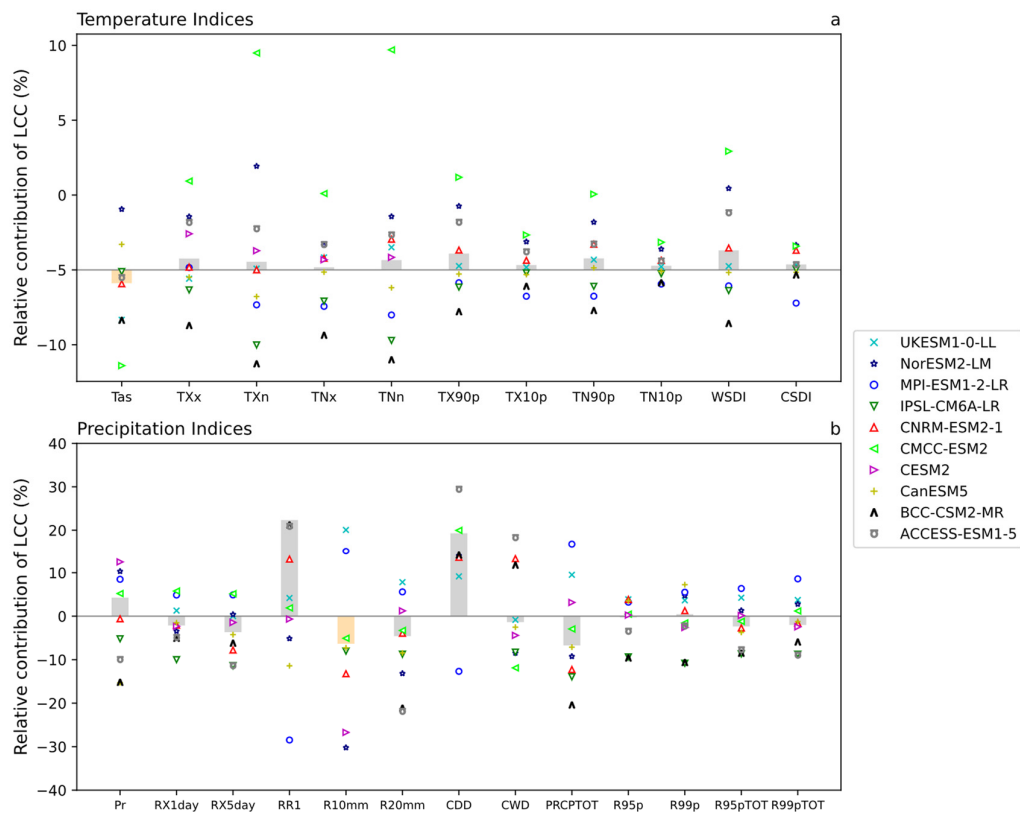

**Figure S8.** Similar to Figure 4 but for global-averaged relative contribution of land use change (i.e. ssp370-ssp126lu – ssp370) under SSP3-7.0 scenario.
